# Supplementary material
Source: PubMed Central journal article supplement (PMC4644467)
Supplement: NIHMS711508-supplement-Supp_FigureS1-S2___TableS1.pdf [file NIHMS711508-supplement-Supp_FigureS1-S2___TableS1.pdf]

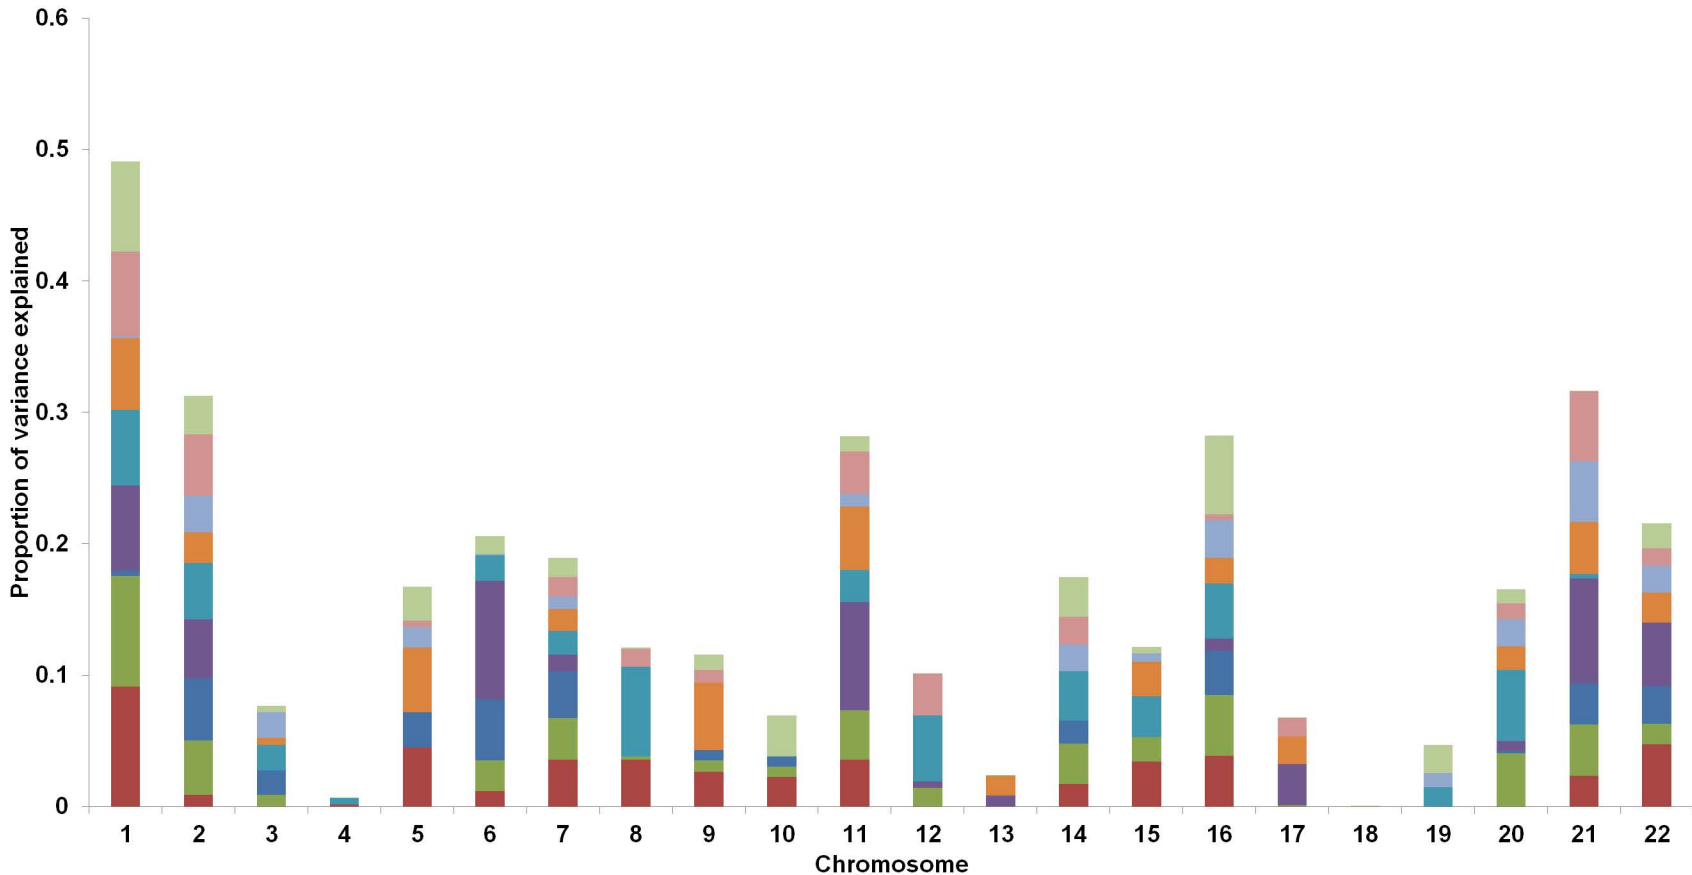

AD

AD Factor

Tolerance

Withdrawal

Using longer than intended

Unsuccessful attempts to cut down

Great time spent using alcohol

Social/Occupation activities foregone

Continued use despite problems

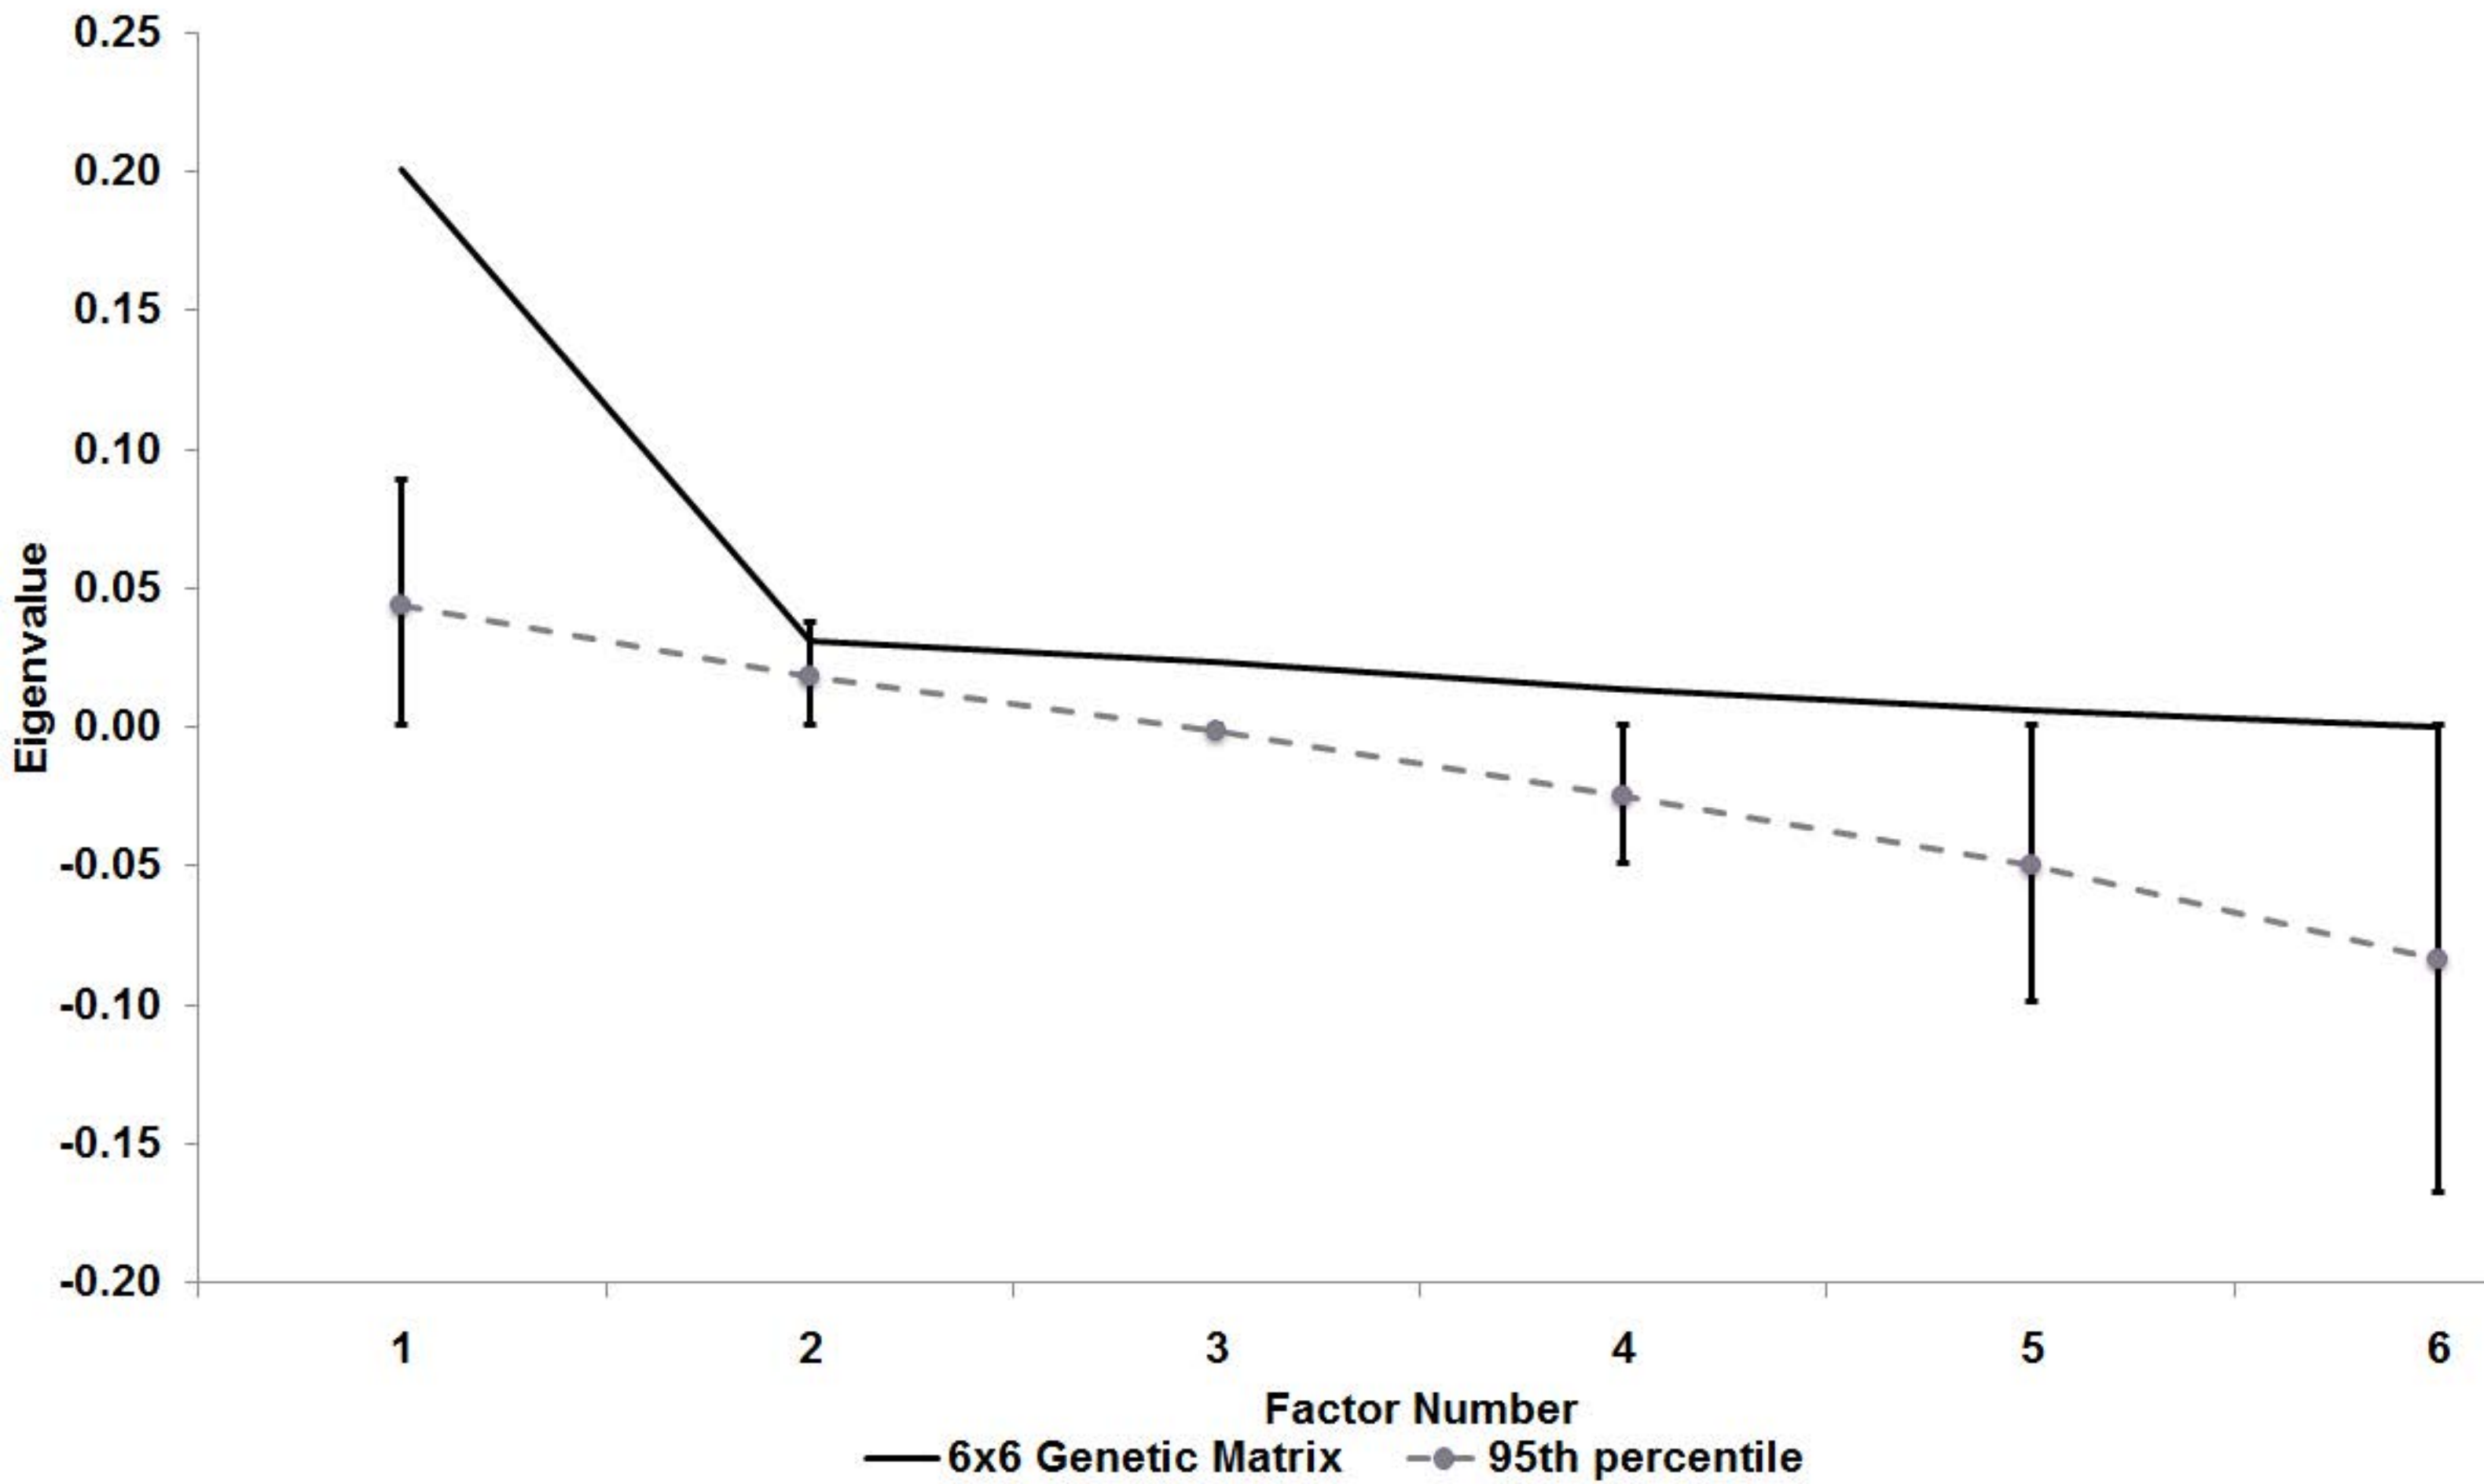

Supplemental Table T1. Proportion of variance explained ( $V_G/V_P$ ) by individual chromosomes

| Chromosome                                                           | Summary Phenotypes |                      | DSM-IV Alcohol Dependence Symptoms |        |        |        |        |        |        |
|----------------------------------------------------------------------|--------------------|----------------------|------------------------------------|--------|--------|--------|--------|--------|--------|
|                                                                      | AD                 | Alcohol Factor Score | Sx1                                | Sx2    | Sx3    | Sx4    | Sx5    | Sx6    | Sx7    |
| 1                                                                    | 0.082              | 0.077                | 0.004                              | 0.035  | 0.053  | 0.033  | <0.001 | 0.057  | 0.031  |
| 2                                                                    | 0.001              | 0.025                | 0.040                              | 0.026  | 0.022  | 0.008  | 0.012  | 0.031  | 0.050  |
| 3                                                                    | <0.001             | 0.007                | 0.017                              | <0.001 | 0.012  | 0.005  | 0.011  | <0.001 | 0.002  |
| 4                                                                    | 0.007              | <0.001               | 0.001                              | <0.001 | 0.009  | <0.001 | <0.001 | <0.001 | 0.008  |
| 5                                                                    | 0.034              | <0.001               | 0.021                              | <0.001 | <0.001 | 0.030  | 0.004  | 0.001  | 0.008  |
| 6                                                                    | <0.001             | 0.004                | 0.035                              | 0.058  | 0.004  | <0.001 | <0.001 | <0.001 | <0.001 |
| 7                                                                    | 0.034              | 0.028                | 0.037                              | 0.010  | 0.009  | 0.002  | 0.006  | 0.005  | <0.001 |
| 8                                                                    | 0.019              | <0.001               | <0.001                             | <0.001 | 0.055  | <0.001 | <0.001 | 0.006  | 0.007  |
| 9                                                                    | 0.014              | 0.008                | 0.004                              | <0.001 | <0.001 | 0.030  | <0.001 | 0.001  | 0.015  |
| 10                                                                   | 0.009              | 0.010                | 0.004                              | <0.001 | <0.001 | <0.001 | <0.001 | <0.001 | 0.008  |
| 11                                                                   | 0.017              | 0.016                | <0.001                             | 0.061  | 0.008  | 0.026  | 0.005  | 0.023  | 0.004  |
| 12                                                                   | <0.001             | 0.007                | <0.001                             | 0.013  | 0.033  | <0.001 | <0.001 | 0.021  | <0.001 |
| 13                                                                   | <0.001             | <0.001               | <0.001                             | 0.013  | <0.001 | 0.015  | <0.001 | <0.001 | <0.001 |
| 14                                                                   | 0.011              | 0.015                | 0.010                              | <0.001 | 0.026  | <0.001 | 0.007  | 0.009  | 0.016  |
| 15                                                                   | 0.018              | 0.012                | <0.001                             | <0.001 | 0.018  | 0.008  | 0.007  | <0.001 | 0.004  |
| 16                                                                   | 0.034              | 0.038                | 0.027                              | 0.017  | 0.037  | 0.002  | 0.019  | 0.002  | 0.041  |
| 17                                                                   | <0.001             | <0.001               | <0.001                             | 0.013  | <0.001 | 0.014  | <0.001 | 0.001  | <0.001 |
| 18                                                                   | <0.001             | <0.001               | <0.001                             | <0.001 | <0.001 | <0.001 | <0.001 | <0.001 | <0.001 |
| 19                                                                   | <0.001             | <0.001               | <0.001                             | <0.001 | 0.005  | <0.001 | 0.006  | <0.001 | 0.017  |
| 20                                                                   | <0.001             | 0.031                | 0.004                              | 0.007  | 0.039  | 0.004  | 0.003  | 0.008  | 0.001  |
| 21                                                                   | 0.011              | 0.025                | 0.021                              | 0.052  | 0.003  | 0.024  | 0.031  | 0.045  | <0.001 |
| 22                                                                   | 0.035              | 0.002                | 0.023                              | 0.025  | <0.001 | 0.003  | 0.006  | 0.007  | 0.021  |
| Total                                                                | 0.326              | 0.304                | 0.248                              | 0.33   | 0.333  | 0.204  | 0.117  | 0.217  | 0.233  |
| Total (ignoring shared effects)                                      | 0.570              | 0.532                | 0.492                              | 0.625  | 0.613  | 0.375  | 0.234  | 0.377  | 0.435  |
| <i>Association between chromosomal length and variance explained</i> |                    |                      |                                    |        |        |        |        |        |        |
| R-square                                                             | 0.099              | 0.098                | 0.072                              | 0.005  | 0.065  | 0.055  | 0.063  | 0.079  | 0.101  |
| P-value                                                              | 0.154              | 0.156                | 0.226                              | 0.766  | 0.251  | 0.292  | 0.261  | 0.204  | 0.149  |

The top half of the table shows the proportion of phenotypic variance explained by the markers on individual chromosomes. The bottom-half shows the association between chromosomal length and the proportion of variance explained by the SNPs on each chromosome. This was derived by regressing percent variance explained on chromosomal length. Description of symptoms are as follows: Sx1: Tolerance, Sx2: Withdrawal, Sx3: Using longer than intended, Sx4: Failure to quit, Sx5: Great time spent using/recovering, Sx6: Social/Occupation activities foregone, Sx7: Continued use despite problems.
